# Supplementary material for: Hsa_circ_001680 affects the proliferation and migration of CRC and mediates its chemoresistance by regulating BMI1 through miR-340
Source: Springer Nature journal article supplement (doi:10.1186/s12943-020-1134-8), 2020-01-31

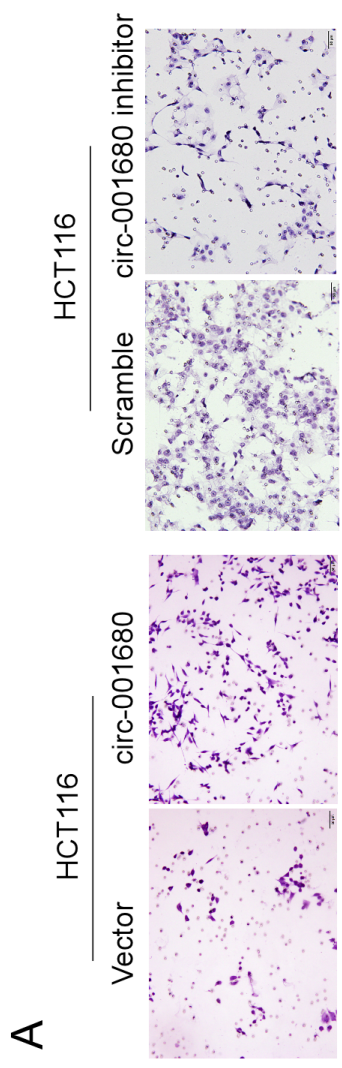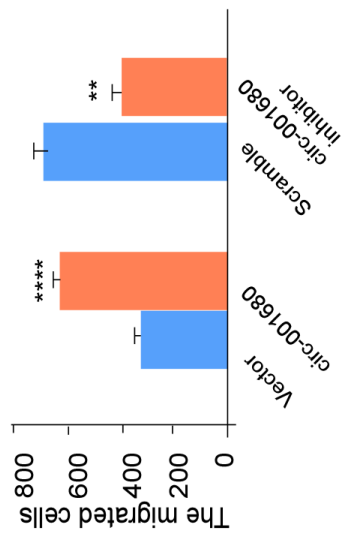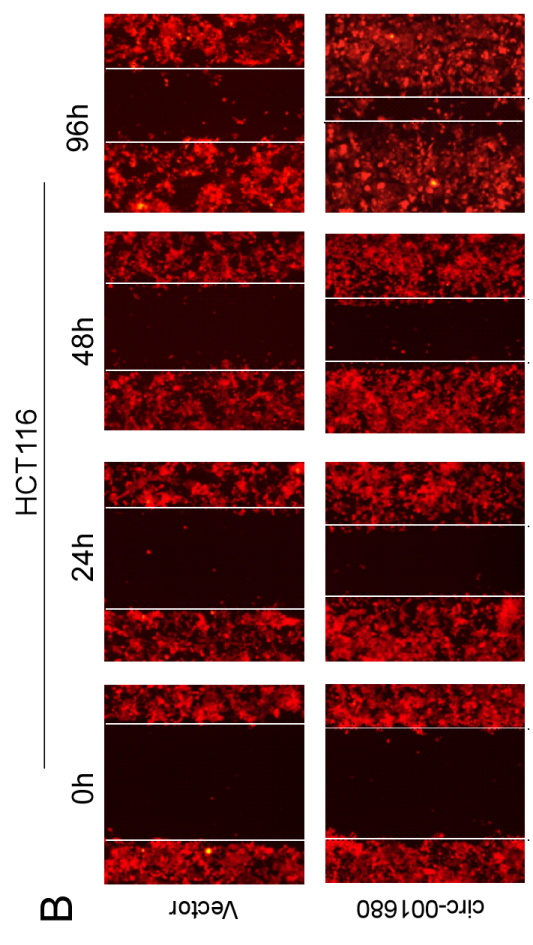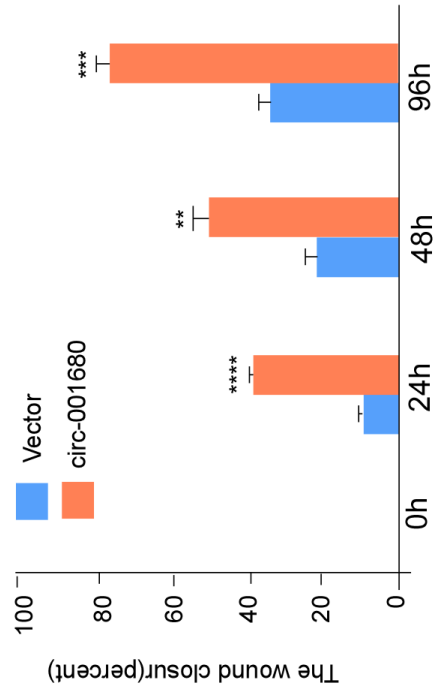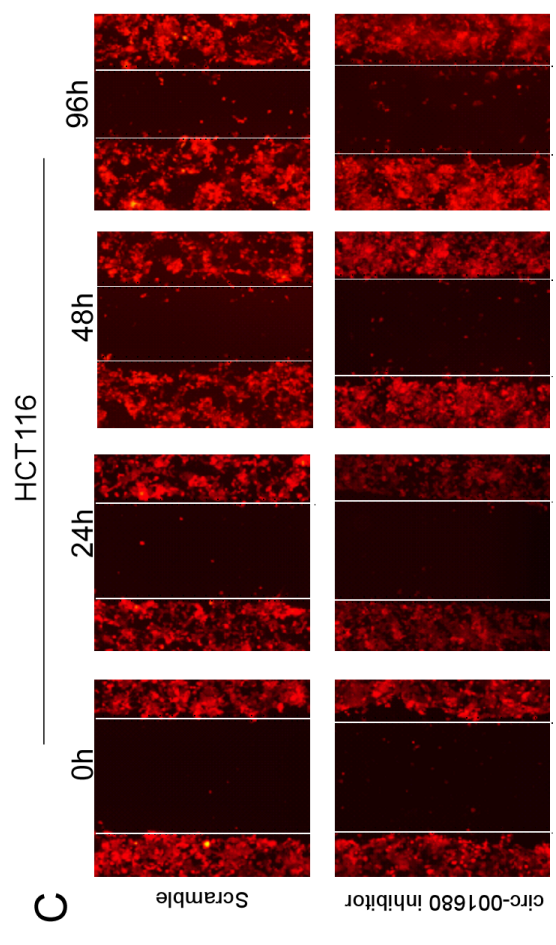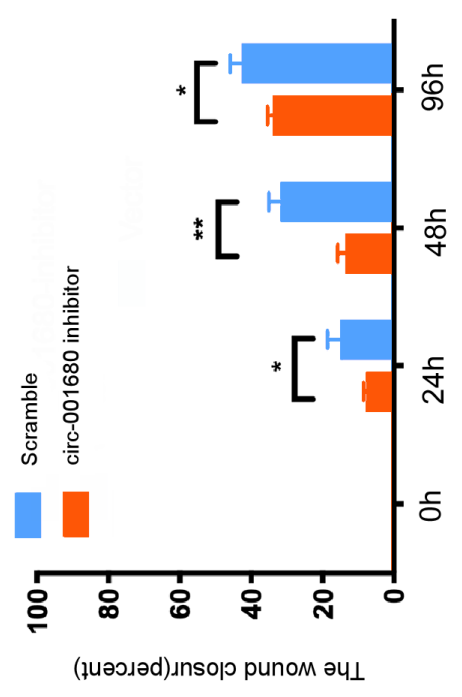

Supplement: MOESM3 [file 17614354]
